# Supplementary material for: Genetic Variation in ABCC4 and CFTR and Acute Pancreatitis during Treatment of Pediatric Acute Lymphoblastic Leukemia
Source: J Clin Med. 2021 Oct 20;10(21):4815. doi: 10.3390/jcm10214815 (PMC8584334; doi:10.3390/jcm10214815)
Supplement: Supplementary file 1 [file jcm-10-04815-s001.zip › jcm-1332118-supplementary.pdf]

## SUPPORTING INFORMATION

### Genetic variation in ABCC4 and CFTR and acute pancreatitis during treatment of pediatric acute lymphoblastic leukemia

Thies Bartram<sup>1,2</sup>, Peter Schütte<sup>2</sup>, Anja Möricke<sup>1</sup>, Richard S. Houlston<sup>3</sup>, Eva Ellinghaus<sup>4</sup>, Martin Zimmermann<sup>2</sup>, Anke Bergmann<sup>5</sup>, Britt-Sabina Petersen<sup>4</sup>, Norman Klein<sup>2</sup>, Laura Hinze<sup>2</sup>, Stefanie V. Junk<sup>2</sup>, Michael Forster<sup>4</sup>, Claus R. Bartram<sup>6</sup>, Rolf Köhler<sup>6</sup>, Andre Franke<sup>4</sup>, Martin Schrappe<sup>1</sup>, Christian Kratz<sup>2</sup>, Gunnar Cario<sup>1</sup>, Martin Stanulla<sup>2\*</sup>

<sup>1</sup>Department of Pediatrics, University Hospital Schleswig-Holstein, Kiel, Germany

<sup>2</sup>Department of Pediatric Hematology and Oncology, Hannover Medical School, Hannover, Germany

<sup>3</sup>Division of Genetics and Epidemiology, Institute of Cancer Research, Surrey, UK

<sup>4</sup>Institute of Clinical Molecular Biology, Kiel University, Kiel, Germany

<sup>5</sup>Department of Human Genetics, Hannover Medical School, Hannover, Germany

<sup>6</sup>Department of Human Genetics, University Hospital Heidelberg, Heidelberg, Germany

\* Correspondence: stanulla.martin@mh-hannover.de; Tel.: (+49-511-532 7978)

**Table S1.** Treatment details of protocol AIEOP-BFM ALL 2000.

| Treatment phase/drug                                   | Single or daily dose                   | Days of application per phase <sup>a</sup> |
|--------------------------------------------------------|----------------------------------------|--------------------------------------------|
| <b><u>Prephase</u></b>                                 |                                        |                                            |
| Prednisone (PO/IV)                                     | 60 mg/m <sup>2</sup> /d                | 1-7                                        |
| Methotrexate (IT)                                      | 12 mg/dose <sup>b</sup>                | 1                                          |
| <b><u>Induction</u></b>                                |                                        |                                            |
| <b><i>Protocol IA</i></b>                              |                                        |                                            |
| Prednisone/Prednisolone (PO/IV) <i>or</i> <sup>c</sup> | 60 mg/m <sup>2</sup> /d                | 8-28 <sup>d</sup>                          |
| Dexamethasone (PO/IV)                                  | 10 mg/m <sup>2</sup> /d                | 8-28 <sup>d</sup>                          |
| Vincristine (IV)                                       | 1.5 mg/m <sup>2</sup> /dose (max 2 mg) | 8, 15, 22, 29                              |
| Daunorubicin (PI over 1 h)                             | 30 mg/m <sup>2</sup> /dose             | 8, 15, 22, 29                              |
| L-Asparaginase (PI over 1 h) <sup>e</sup>              | 5000 IU/m <sup>2</sup> /dose           | 12, 15, 18, 21, 24, 27, 30, 33             |
| Methotrexate (IT)                                      | 12 mg/dose <sup>b</sup>                | 12, 33 <sup>f</sup>                        |
| <b><u>Consolidation</u></b>                            |                                        |                                            |
| <b><i>Protocol IB</i></b>                              |                                        |                                            |
| Cyclophosphamide (PI over 1 h)                         | 1000 mg/m <sup>2</sup> /dose           | 36, 64                                     |
| Cytarabine (IV)                                        | 75 mg/m <sup>2</sup> /dose             | 38-41, 45-48, 52-55, 59-62                 |
| 6-Mercaptopurine (PO)                                  | 60 mg/m <sup>2</sup> /d                | 36-63                                      |
| Methotrexate (IT)                                      | 12 mg/dose <sup>b</sup>                | 45, 59                                     |
| <b><u>Extra-Compartment Therapy</u></b>                |                                        |                                            |
| <b><u>(only SR/MR)</u></b>                             |                                        |                                            |
| <b><i>Protocol M:</i></b>                              |                                        |                                            |
| 6-Mercaptopurine (PO)                                  | 25 mg/m <sup>2</sup> /d                | 1-56                                       |
| Methotrexate (PI over 24 h) <sup>g</sup>               | 5000 mg/m <sup>2</sup> /dose           | 8, 22, 36, 50                              |
| Methotrexate (IT)                                      | 12 mg/dose <sup>b</sup>                | 8, 22, 36, 50                              |
| <b><u>Intensive Consolidation (only HR)</u></b>        |                                        |                                            |
| <b><i>Element HR-1'</i></b>                            |                                        |                                            |
| Dexamethasone (PO/IV)                                  | 20 mg/m <sup>2</sup> /d                | 1-5                                        |
| Vincristine (IV)                                       | 1.5 mg/m <sup>2</sup> (max 2 mg)       | 1, 6                                       |
| Methotrexate (PI over 24 h) <sup>g</sup>               | 5000 mg/m <sup>2</sup> /dose           | 1                                          |
| Cyclophosphamide (PI over 1 h)                         | 200 mg/m <sup>2</sup> /dose            | 2-4 (5 doses, 12 h intervals)              |
| Cytarabine (PI over 3 h)                               | 2 g/m <sup>2</sup> /dose               | 5 (2 doses, 12 h interval)                 |
| L-Asparaginase (PI over 2 h) <sup>e</sup>              | 25,000 IU/m <sup>2</sup> /dose         | 6, 11                                      |
| Methotrexate/Cytarabine/<br>Prednisolone (IT)          | 12/30/10 mg/dose <sup>b</sup>          | 1                                          |
| <b><i>Element HR-2'</i></b>                            |                                        |                                            |
| Dexamethasone (PO/IV)                                  | 20 mg/m <sup>2</sup> /d                | 1-5                                        |
| Vindesine (IV)                                         | 3 mg/m <sup>2</sup> /dose (max 5 mg)   | 1, 6                                       |
| Methotrexate (PI over 24 h) <sup>g</sup>               | 5000 mg/m <sup>2</sup> /dose           | 1                                          |
| Ifosfamide (PI over 1 h)                               | 800 mg/m <sup>2</sup> /dose            | 2-4 (5 doses, 12 h intervals)              |
| Daunorubicin (PI over 24 h)                            | 30 mg/m <sup>2</sup> /dose             | 5                                          |
| L-Asparaginase (PI over 2 h) <sup>e</sup>              | 25,000 IU/m <sup>2</sup> /dose         | 6, 11                                      |
|                                                        | 12/30/10 mg/dose <sup>b</sup>          | 1 <sup>h</sup>                             |

| Treatment phase/drug                          | Single or daily dose                    | Days of application per phase <sup>a</sup> |
|-----------------------------------------------|-----------------------------------------|--------------------------------------------|
| Methotrexate/Cytarabine/<br>Prednisolone (IT) |                                         |                                            |
| <b><i>Element HR-3'</i></b>                   |                                         |                                            |
| Dexamethasone (PO/IV)                         | 20 mg/m <sup>2</sup> /d                 | 1-5                                        |
| Cytarabine (PI over 3 h)                      | 2 g/m <sup>2</sup> /dose                | 1-2 (4 doses, 12 h intervals)              |
| Etoposide (PI over 1 h)                       | 100 mg/m <sup>2</sup> /dose             | 3-5 (5 doses, 12 h intervals)              |
| L-Asparaginase (PI over 2 h) <sup>e</sup>     | 25,000 IU/m <sup>2</sup> /dose          | 6, 11                                      |
| Methotrexate/Cytarabine/<br>Prednisolone (IT) | 12/30/10 mg/dose <sup>b</sup>           | 5                                          |
| <b><u>Reinduction</u></b>                     |                                         |                                            |
| <b><i>Protocol II</i></b>                     |                                         |                                            |
| Dexamethasone (PO/IV)                         | 10 mg/m <sup>2</sup> /d                 | 1-21 <sup>d</sup>                          |
| Vincristine (IV)                              | 1.5 mg/m <sup>2</sup> /dose (max 2 mg)  | 8, 15, 22, 29                              |
| Doxorubicin (PI over 1 h)                     | 30 mg/m <sup>2</sup> /dose              | 8, 15, 22, 29                              |
| L-Asparaginase (PI over 1 h) <sup>e</sup>     | 10,000 IU/m <sup>2</sup> /dose          | 8, 11, 15, 18                              |
| Cyclophosphamide (PI over 1 h)                | 1000 mg/m <sup>2</sup> /dose            | 36                                         |
| Cytarabine (IV)                               | 75 mg/m <sup>2</sup> /dose              | 38-41, 45-48                               |
| 6-Thioguanine (PO)                            | 60 mg/m <sup>2</sup> /d                 | 36-49                                      |
| Methotrexate (IT)                             | 12 mg/dose <sup>b</sup>                 | 45, 59 <sup>h</sup>                        |
| <b><i>Protocol III</i></b>                    |                                         |                                            |
| Dexamethasone (PO)                            | 10 mg/m <sup>2</sup> /d                 | 1-14 <sup>d</sup>                          |
| Vincristine (IV)                              | 1.5 mg/m <sup>2</sup> /dose (max 2 mg)  | 1, 8                                       |
| Doxorubicin (PI over 1 h)                     | 30 mg/m <sup>2</sup> /dose              | 1, 8                                       |
| L-Asparaginase (PI over 1 h) <sup>e</sup>     | 10,000 IU/m <sup>2</sup> /dose          | 1, 4, 8, 11                                |
| Cyclophosphamide (PI over 1 h)                | 500 mg/m <sup>2</sup> /dose             | 15                                         |
| Cytarabine (IV)                               | 75 mg/m <sup>2</sup> /dose              | 17-20, 24-27                               |
| 6-Thioguanine (PO)                            | 60 mg/m <sup>2</sup> /d                 | 15-28                                      |
| Methotrexate (IT)                             | 12 mg/dose <sup>b</sup>                 | 17, 24 <sup>h</sup>                        |
| <b><u>Interim Maintenance</u></b>             |                                         |                                            |
| Methotrexate (PO)                             | 20 mg/m <sup>2</sup> /dose              | once a week                                |
| 6-Mercaptopurine (PO)                         | 50 mg/m <sup>2</sup> /d                 | daily                                      |
| <b><u>Maintenance</u><sup>i</sup></b>         |                                         |                                            |
| Methotrexate (PO)                             | 20 mg/m <sup>2</sup> /dose <sup>i</sup> | once a week                                |
| 6-Mercaptopurine (PO)                         | 50 mg/m <sup>2</sup> /d <sup>i</sup>    | daily                                      |
| Cranial irradiation                           | 12 Gy/18 Gy/24 Gy                       |                                            |

<sup>a</sup>Adjustments of time schedule were allowed if clinical condition and bone marrow recovery were inadequate.

<sup>b</sup>Doses of IT drugs were adjusted for children <3 years of age.

<sup>c</sup>Randomization

<sup>d</sup>Steroids were tapered over 9 additional days.

<sup>e</sup> L-Asparaginase dose was not modified in case of asymptotically elevated amylase and/or lipase levels. If there was confirmed pancreatitis, L-Asparaginase therapy had to be discontinued. As a matter of principle it was not recommended to continue L-Asparaginase therapy (including with other preparations, e.g. Erwinia Asparaginase) after acute pancreatitis. In case of very mild forms of pancreatitis (no correlation in image morphology, improvement after only a few days with conservative treatment), reinstatement of L-Asparaginase may have been considered following consultation with the study coordination center.

<sup>f</sup>Additional IT therapy on day 18 and 27 was administered to patients with CNS status CNS3 and CNS2 or TLP+.

<sup>g</sup>A loading dose of 10% was infused over 30 min, the remaining 90% over 23.5 h. Leucovorin rescue was given at hour 42, 48, and 54 (each 15 mg/m<sup>2</sup>). Doses of leucovorin rescue were adjusted, if MTX levels were > 1.0 µmol/l at hour 42 or later. If the MTX level at hour 54 was > 0.25 µmol/l, rescue was continued at six-hour intervals until MTX levels were ≤ 0.25 µmol/l.

<sup>h</sup>Patients with CNS status CNS 3 received additional IT therapy on day 5 in element HR-2' (only BFM), on day 1 and 18 in Protocol II and on day 1 in Protocol III.

<sup>i</sup>Maintenance was given from the end of intensive chemotherapy until 104 weeks after diagnosis.

<sup>j</sup>Doses were adjusted to WBC (target range 2.0-3.0 x10<sup>9</sup>/L).

PO indicates orally; IV, intravenous push; PI, intravenous infusion; IT, intrathecally.

**Table S2.** Additional information on top AP-associated SNV from GWAS and fine-mapping (NGS) analyses.

| Cohort | Chr | Position (bp) | dbSNP ID   | Nearby genes    | Category  | Variant position | Comment                  |
|--------|-----|---------------|------------|-----------------|-----------|------------------|--------------------------|
| GWAS   | 13  | 95790353      | rs4148513  | <i>ABCC4</i>    | SNV       | intronic         | intron 13                |
| GWAS   | 7   | 85465201      | rs17160216 | <i>SEMA3D</i>   | SNV       | intergenic       | --                       |
| GWAS   | 15  | 36372995      | rs698457   | <i>C15orf41</i> | SNV       | intergenic       | --                       |
| GWAS   | 7   | 106850181     | rs6963190  | <i>COG5</i>     | SNV       | exonic           | exone 21, UTR3'          |
| GWAS   | 7   | 116857547     | rs7804397  | <i>ST7</i>      | SNV       | intronic         | intron 13                |
| GWAS   | 19  | 18942559      | rs2238652  | <i>UPF1</i>     | SNV       | intergenic       | 185 bp from 5'           |
| GWAS   | 13  | 95818288      | rs4148500  | <i>ABCC4</i>    | SNV       | intronic         | intron 17                |
| GWAS   | 5   | 44005497      | rs6858970  | <i>FGF10</i>    | SNV       | intergenic       | --                       |
| GWAS   | 1   | 118847717     | rs12402476 | <i>SPAG17</i>   | SNV       | intergenic       | --                       |
| GWAS   | 19  | 58214147      | rs34282745 | <i>ZNF154</i>   | SNV       | exonic           | exone 3, missense (H->R) |
| GWAS   | 14  | 104565922     | rs737394   | <i>ASPG</i>     | SNV       | intronic         | intron 6                 |
| GWAS   | 7   | 88513041      | rs2214632  | <i>ZNF804B</i>  | SNV       | intronic         | intron 1                 |
| GWAS   | 11  | 130264278     | rs7480329  | <i>ADAMTS8</i>  | SNV       | intergenic       | --                       |
| GWAS   | 4   | 170030472     | rs17658514 | <i>SH3RF1</i>   | SNV       | intronic         | intron 2                 |
| GWAS   | 4   | 170092033     | rs13118066 | <i>SH3RF1</i>   | SNV       | intronic         | intron 10                |
| GWAS   | 9   | 120052359     | rs7026867  | <i>ASTN2</i>    | SNV       | intronic         | intron 20                |
| GWAS   | 17  | 46688371      | rs16942475 | <i>HOXB7</i>    | SNV       | exonic           | exone 1, UTR5'           |
| GWAS   | 4   | 1720312       | rs798752   | <i>TMEM129</i>  | SNV       | exonic           | exone 2, missense (L->I) |
| GWAS   | 9   | 90170231      | rs6560001  | <i>DAPK1</i>    | SNV       | intronic         | intron 2                 |
| GWAS   | 12  | 92833965      | rs17837141 | <i>CLLU1</i>    | SNV       | intergenic       | --                       |
| NGS    | 13  | 95680323      | rs34839857 | <i>ABCC4</i>    | Insertion | intronic         | intron 30                |
| NGS    | 13  | 95925010      | rs4773864  | <i>ABCC4</i>    | SNV       | intronic         | intron 1                 |
| NGS    | 13  | 95910230      | rs4773862  | <i>ABCC4</i>    | SNV       | intronic         | intron 1                 |
| NGS    | 13  | 95919634      | rs2027444  | <i>ABCC4</i>    | SNV       | intronic         | intron 1                 |
| NGS    | 13  | 95922306      | rs79230687 | <i>ABCC4</i>    | SNV       | intronic         | intron 1                 |
| NGS    | 7   | 117140634     | rs62469434 | <i>CFTR</i>     | SNV       | intronic         | intron 1                 |
| NGS    | 13  | 95910321      | rs2389226  | <i>ABCC4</i>    | SNV       | intronic         | intron 1                 |
| NGS    | 7   | 117308456     | rs55831234 | <i>CFTR</i>     | SNV       | exonic           | exone 27, UTR3'          |

Abbreviations: Chr, chromosome; bp, base pair; dbSNP, Single Nucleotide Polymorphism database; UTR, untranslated region; H, Histidine; R, Arginine; L, Leucine; I, Isoleucine

**Table S3.** SNV within the *CPA2*, *PRSS1* and *ULK2* genes previously identified by GWAS analyses and their association with AP in our cohort.

| Gene         | Chr:position (bp) | dbSNP ID   | Location | Function | A1/A2 | AF <sub>A1</sub> contr. | AF <sub>A1</sub> cases | P value <sup>a</sup> | OR   | 95% CI      |
|--------------|-------------------|------------|----------|----------|-------|-------------------------|------------------------|----------------------|------|-------------|
| <i>CPA2</i>  | 7:129912602       | rs2242337  | intronic |          | G/A   | 0.2954                  | 0.2451                 | 0.27                 | 0.77 | 0.49 - 1.23 |
|              | 7:129912991       |            |          |          | -/G   | 0                       | 0                      | NA                   | NA   |             |
|              | 7:129916030       | rs9641869  | intronic |          | G/A   | 0.1525                  | 0.1569                 | 0.9                  | 1.03 | 0.60 - 1.78 |
|              | 7:129916501       |            |          |          | -/A   | 0                       | 0                      | NA                   | NA   |             |
|              | 7:129916515       | rs17590    | exonic   | silent   | T/C   | 0.4009                  | 0.4118                 | 0.83                 | 1.05 | 0.70 - 1.56 |
|              | 7:129916532       |            |          |          | -/T   | 0                       | 0                      | NA                   | NA   |             |
|              | 7:129918947       | rs10244258 | intronic |          | -/C   | 0                       | 0                      | NA                   | NA   |             |
|              | 7:129920239       | rs10215911 | intronic |          | T/C   | 0.4009                  | 0.4118                 | 0.83                 | 1.05 | 0.70 - 1.56 |
|              | 7:129923765       | rs2178158  | intronic |          | A/G   | 0.1016                  | 0.0882                 | 0.66                 | 0.86 | 0.43 - 1.72 |
|              | 7:129925510       | rs10242953 | intronic |          | -/T   | 0                       | 0                      | NA                   | NA   |             |
|              | 7:129927778       | rs6467293  | intronic |          | A/G   | 0.1381                  | 0.1275                 | 0.76                 | 0.91 | 0.50 - 1.65 |
| <i>PRSS1</i> | 7:142136502       | rs10273639 |          |          | T/C   | 0.4423                  | 0.3431                 | 0.05                 | 0,66 | 0.43 - 1.00 |
| <i>ULK2</i>  | 17:19674364       | rs11658829 | intronic |          | A/C   | 0.0004                  | 0                      | 0.85                 | 0    |             |
|              | 17:19675013       | rs9900160  | intronic |          | A/G   | 0.0007                  | 0                      | 0.79                 | 0    |             |
|              | 17:19675104       | rs205111   | intronic |          | A/G   | 0.0321                  | 0.0098                 | 0.20                 | 0.3  | 0.04 - 2.17 |
|              | 17:19675547       | rs9895806  | intronic |          | T/C   | 0                       | 0                      | NA                   | NA   |             |
|              | 17:19675588       | rs205110   | intronic |          | G/A   | 0.0331                  | 0.0098                 | 0.19                 | 0.29 | 0.04 - 2.09 |
|              | 17:19675775       | rs17720618 | intronic |          | C/G   | 0.1190                  | 0.1176                 | 0.97                 | 0.99 | 0.53 - 1.82 |
|              | 17:19676673       | rs9914674  | intronic |          | -/A   | 0                       | 0                      | NA                   | NA   |             |
|              | 17:19676691       | rs118943   | intronic |          | T/C   | 0.0331                  | 0.0098                 | 0.19                 | 0.29 | 0.04 - 2.09 |
|              | 17:19677749       | rs115326   | intronic |          | G/C   | 0.0332                  | 0.0098                 | 0.19                 | 0.29 | 0.04 - 2.09 |
|              | 17:19678308       | rs205108   | intronic |          | T/G   | 0.0375                  | 0.0196                 | 0.35                 | 0.51 | 0.13 - 2.11 |
|              | 17:19678475       | rs205107   | intronic |          | C/T   | 0.0332                  | 0.0098                 | 0.19                 | 0.29 | 0.04 - 2.09 |
|              | 17:19679721       |            |          |          | -/C   | 0                       | 0                      | NA                   | NA   |             |
|              | 17:19684290       | rs1662214  | intronic |          | -/G   | 0                       | 0                      | NA                   | NA   |             |

|             |            |          |          |     |        |        |                         |      |             |
|-------------|------------|----------|----------|-----|--------|--------|-------------------------|------|-------------|
| 17:19684364 |            |          |          | -/G | 0      | 0      | NA                      | NA   |             |
| 17:19692809 | rs11656704 | intronic |          | A/G | 0.2383 | 0.2059 | 0.45                    | 0.83 | 0.51 - 1.35 |
| 17:19697976 | rs17794370 | intronic |          | A/G | 0.2752 | 0.2353 | 0.37                    | 0.81 | 0.51 - 1.30 |
| 17:19699121 | rs157386   | intronic |          | T/C | 0.1348 | 0.1700 | 0.31                    | 1.31 | 0.77 - 2.24 |
| 17:19713740 | rs150122   | exonic   | missense | G/A | 0.0335 | 0.0098 | 0.19                    | 0.29 | 0.04 - 2.07 |
| 17:19714206 | rs157407   | intronic |          | C/T | 0.0513 | 0.0294 | 0.32                    | 0.56 | 0.18 - 1.79 |
| 17:19720838 | rs16960454 | intronic |          | C/T | 0.2628 | 0.3137 | 0.25                    | 1.28 | 0.84 - 1.97 |
| 17:19724155 | rs157395   | intronic |          | G/A | 0.0335 | 0.0098 | 0.17                    | 0.29 | 0.04 - 2.07 |
| 17:19728077 | rs9898591  | intronic |          | C/T | 0      | 0.0098 | 1.85 x 10 <sup>-7</sup> | NA   |             |

Abbreviations: A1, minor allele; A2, major allele; AF, allele frequency; Chr, chromosome; CI, confidence interval; NA, not analyzed; OR, odds ratio.

<sup>a</sup>allele-based  $\chi^2$ -test (one degree of freedom); chromosomal location is based on hg19.

**Table S4.** Genotype frequencies and association with risk of AP for SNV derived from fine-mapping by NGS analyses in the initial cohort.

| Gene         | Variant    | Genotype | Cases (%) | Controls (%) | OR (95% CI)       | <i>P</i> value <sup>a</sup> |
|--------------|------------|----------|-----------|--------------|-------------------|-----------------------------|
| <i>ABCC4</i> | rs34839857 | G_G_     | 32 (68.1) | 38 (86.4)    | 1.00 (referent)   |                             |
|              |            | G_GA     | 9 (19.1)  | 5 (11.4)     | 2.14 (0.65-7.03)  | 0.211                       |
|              |            | GAGA     | 6 (12.8)  | 1 (2.3)      | 7.13 (0.82-62.32) | 0.076                       |
| <i>ABCC4</i> | rs4773864  | CC       | 39 (81.2) | 44 (95.7)    | 1.00 (referent)   |                             |
|              |            | CT       | 9 (18.7)  | 2 (4.3)      | 5.08 (1.03-24.94) | 0.045                       |
|              |            | TT       | 0         | 0            |                   |                             |
| <i>ABCC4</i> | rs4773862  | CC       | 39 (81.2) | 45 (95.7)    | 1.00 (referent)   |                             |
|              |            | CT       | 9 (18.7)  | 2 (4.3)      | 5.19 (1.06-25.49) | 0.042                       |
|              |            | TT       | 0         | 0            |                   |                             |
| <i>ABCC4</i> | rs2027444  | CC       | 39 (81.2) | 45 (95.7)    | 1.00 (referent)   |                             |
|              |            | CT       | 9 (18.7)  | 2 (4.3)      | 5.19 (1.06-25.49) | 0.042                       |
|              |            | TT       | 0         | 0            |                   |                             |
| <i>ABCC4</i> | rs79230687 | AA       | 39 (81.2) | 45 (95.7)    | 1.00 (referent)   |                             |
|              |            | AG       | 9 (18.7)  | 2 (4.3)      | 5.19 (1.06-25.49) | 0.042                       |
|              |            | GG       | 0         | 0            |                   |                             |
| <i>CFTR</i>  | rs62469434 | GG       | 38 (79.2) | 45 (95.7)    | 1.00 (referent)   |                             |
|              |            | GA       | 9 (18.7)  | 2 (4.3)      | 5.33(1.09-26.18)  | 0.039                       |
|              |            | AA       | 1 (2.1)   | 0            | --                | 1.00                        |
| <i>ABCC4</i> | rs2389226  | TT/AA    | 39 (81.2) | 45 (95.7)    | 1.00 (referent)   |                             |
|              |            | CT/CA    | 9 (18.7)  | 2 (4.3)      | 5.19 (1.06-25.49) | 0.042                       |
|              |            | CC       | 0         | 0            | --                |                             |

Abbreviations: OR, odds ratio; CI, confidence interval

<sup>a</sup>unconditional logistic regression analysis

**Table S5.** Genotype frequencies and association with risk of AP for SNV derived from fine-mapping by NGS analyses in the replication cohort.

| Gene         | Variant    | Genotype | Cases (%) | Controls (%) | OR (95% CI)       | <i>P</i> value <sup>a</sup> |
|--------------|------------|----------|-----------|--------------|-------------------|-----------------------------|
| <i>ABCC4</i> | rs34839857 | G_G_     | 26 (70.3) | 29 (80.6)    | 1.00 (referent)   |                             |
|              |            | G_GA     | 11 (29.7) | 6 (16.7)     | 2.05 (0.66-6.31)  | 0.213                       |
|              |            | GAGA     | 0         | 1 (2.7)      |                   | 1.00                        |
| <i>ABCC4</i> | rs4773864  | CC       | 37 (90.2) | 37 (97.4)    | 1.00 (referent)   |                             |
|              |            | CT       | 4 (9.8)   | 1 (2.6)      | 4.00 (0.43-37.51) | 0.225                       |
|              |            | TT       | 0         | 0            |                   |                             |
| <i>ABCC4</i> | rs4773862  | CC       | 35 (87.5) | 40 (97.6)    | 1.00 (referent)   |                             |
|              |            | CT       | 5 (12.5)  | 1 (2.4)      | 5.71 (0.64-51.29) | 0.120                       |
|              |            | TT       | 0         | 0            |                   |                             |
| <i>ABCC4</i> | rs2027444  | CC       | 37 (88.1) | 40 (97.6)    | 1.00 (referent)   |                             |
|              |            | CT       | 5 (11.9)  | 1 (2.4)      | 5.41 (0.60-48.45) | 0.132                       |
|              |            | TT       | 0         | 0            |                   |                             |
| <i>ABCC4</i> | rs79230687 | AA       | 37 (88.1) | 40 (97.6)    | 1.00 (referent)   |                             |
|              |            | AG       | 5 (11.9)  | 1 (2.4)      | 5.41 (0.60-48.45) | 0.132                       |
|              |            | GG       | 0         | 0            |                   |                             |
| <i>CFTR</i>  | rs62469434 | GG       | 38 (90.5) | 34 (82.9)    | 1.00 (referent)   |                             |
|              |            | GA       | 4 (9.5)   | 7 (17.1)     | 0.51 (0.14-1.90)  | 0.317                       |
|              |            | AA       | 0         | 0            | --                |                             |
| <i>ABCC4</i> | rs2389226  | TT/AA    | 36 (87.8) | 39 (97.5)    | 1.00 (referent)   |                             |
|              |            | CT/CA    | 5 (12.2)  | 1 (2.5)      | 5.42 (0.60-48.61) | 0.131                       |
|              |            | CC       | 0         | 0            | --                |                             |

Abbreviations: OR, odds ratio; CI, confidence interval

<sup>a</sup>unconditional logistic regression analysis

**Table S6:** Genotype frequencies and association with risk of AP for SNV derived from fine-mapping by NGS analyses in the combined cohort (initial and replication).

| Gene         | Variant    | Genotype | Cases (%) | Controls (%) | OR (95% CI)       | P value <sup>a</sup> |
|--------------|------------|----------|-----------|--------------|-------------------|----------------------|
| <i>ABCC4</i> | rs34839857 | G_G_     | 58 (69)   | 67 (83.8)    | 1.00 (referent)   |                      |
|              |            | G_GA     | 20 (23.8) | 11 (13.8)    | 2.1 (0.93-4.75)   | 0.070                |
|              |            | GAGA     | 6 (7.1)   | 2 (2.5)      | 3.47 (0.67-17.84) | 0.137                |
| <i>ABCC4</i> | rs4773864  | CC       | 76 (85.4) | 81 (96.4)    | 1.00 (referent)   |                      |
|              |            | CT       | 13 (14.6) | 3 (3.6)      | 4.62 (1.27-16.84) | 0.020                |
|              |            | TT       | 0         | 0            |                   |                      |
| <i>ABCC4</i> | rs4773862  | CC       | 74 (84.1) | 85 (96.6)    | 1.00 (referent)   |                      |
|              |            | CT       | 14 (15.9) | 3 (3.4)      | 5.36 (1.48-19.38) | 0.010                |
|              |            | TT       | 0         | 0            |                   |                      |
| <i>ABCC4</i> | rs2027444  | CC       | 76 (84.4) | 85 (96.6)    | 1.00 (referent)   |                      |
|              |            | CT       | 14 (15.6) | 3 (3.4)      | 5.22 (1.44-18.86) | 0.012                |
|              |            | TT       | 0         | 0            |                   |                      |
| <i>ABCC4</i> | rs79230687 | AA       | 76 (84.4) | 85 (96.6)    | 1.00 (referent)   |                      |
|              |            | AG       | 14 (15.6) | 3 (3.4)      | 5.22 (1.44-18.86) | 0.012                |
|              |            | GG       | 0         | 0            |                   |                      |
| <i>CFTR</i>  | rs62469434 | GG       | 76 (84.4) | 79 (89.8)    | 1.00 (referent)   |                      |
|              |            | GA       | 13 (14.4) | 9 (10.2)     | 1.5 (0.61-3.72)   | 0.379                |
|              |            | AA       | 1 (1.1)   | 0            | --                | 1.00                 |
| <i>ABCC4</i> | rs2389226  | TT/AA    | 75 (84.3) | 84 (96.6)    | 1.00 (referent)   |                      |
|              |            | CT/CA    | 14 (15.7) | 3 (3.4)      | 5.23 (1.45-18.90) | 0.012                |
|              |            | CC       | 0         | 0            | --                |                      |

Abbreviations: OR, odds ratio; CI, confidence interval

<sup>a</sup>unconditional logistic regression analysis

**Table S7.** Linkage disequilibrium of top *ABCC4* SNV from GWAS and fine-mapping analyses.

| dbSNP ID   | rs34839857     |       | rs4773864      |       | rs4773862      |       | rs2027444      |       | rs79230687     |       | rs2389226      |       | rs4148513*     |       |
|------------|----------------|-------|----------------|-------|----------------|-------|----------------|-------|----------------|-------|----------------|-------|----------------|-------|
|            | r <sup>2</sup> | D'    |
| rs34839857 | x              | x     | 0.002          | 0.409 | 0.002          | 0.403 | 0.002          | 0.403 | 0.002          | 0.403 | 0.004          | 0.457 | 0.026          | 0.527 |
| rs4773864  | 0.002          | 0.409 | x              | x     | 1              | 1     | 1              | 1     | 1              | 1     | 0.668          | 1     | 0.016          | 0.249 |
| rs4773862  | 0.002          | 0.403 | 1              | 1     | x              | x     | 1              | 1     | 1              | 1     | 0.669          | 1     | 0.016          | 0.25  |
| rs2027444  | 0.002          | 0.403 | 1              | 1     | 1              | 1     | x              | x     | 1              | 1     | 0.669          | 1     | 0.016          | 0.25  |
| rs79230687 | 0.002          | 0.403 | 1              | 1     | 1              | 1     | 1              | 1     | x              | x     | 0.669          | 1     | 0.016          | 0.25  |
| rs2389226  | 0.004          | 0.457 | 0.668          | 1     | 0.669          | 1     | 0.669          | 1     | 0.669          | 1     | x              | x     | 0.013          | 0.273 |
| rs4148513* | 0.026          | 0.527 | 0.016          | 0.249 | 0.016          | 0.25  | 0.016          | 0.25  | 0.016          | 0.25  | 0.013          | 0.273 | x              | x     |

\*= Top candidate SNV from GWAS

**Table S8.** Linkage disequilibrium of *CFTR* SNV.

| dbSNP ID   | rs62469434     |       | rs55831234     |       |
|------------|----------------|-------|----------------|-------|
|            | r <sup>2</sup> | D'    | r <sup>2</sup> | D'    |
| rs62469434 | x              | x     | 0.011          | 0.228 |
| rs55831234 | 0.011          | 0.228 | x              | x     |

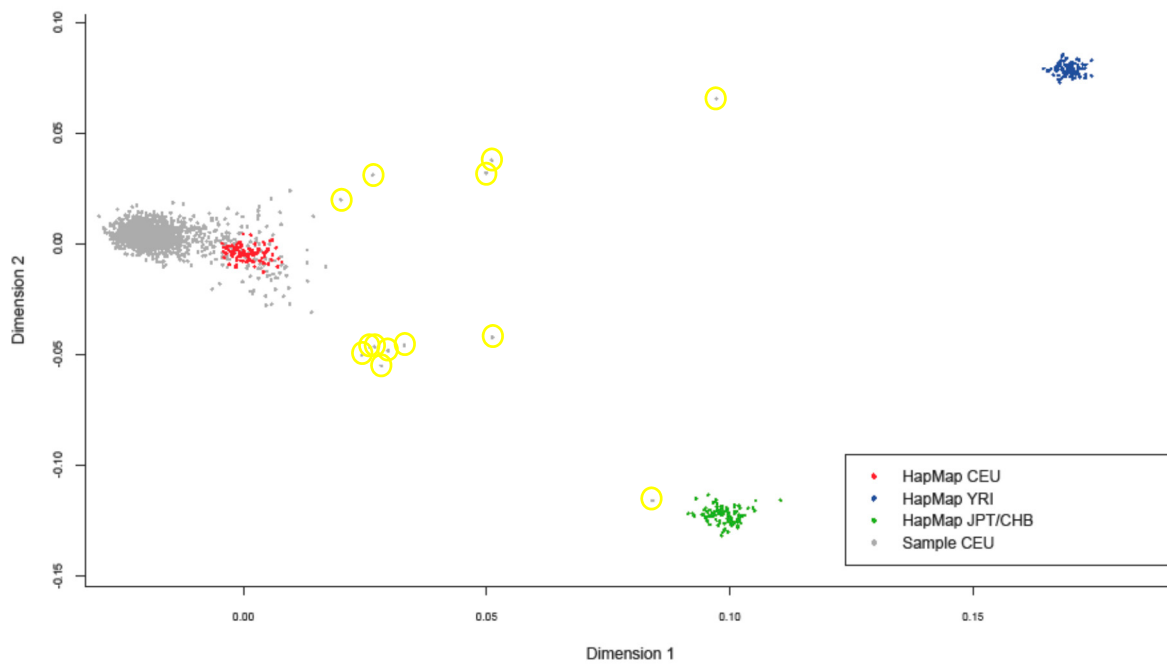

**Figure S1.** Identification of individuals in the GWA scan of non-European ancestry. The multidimensional scaling plot (MDS) shows genuine European ancestry for the cleaned GWAS cohort, which was plotted with the three distinct HapMap sample populations (see legend box in the plot) for the first two principle components. Thirteen samples showed evidence of non-European ancestry (see yellow circles in the plot) and were therefore removed.

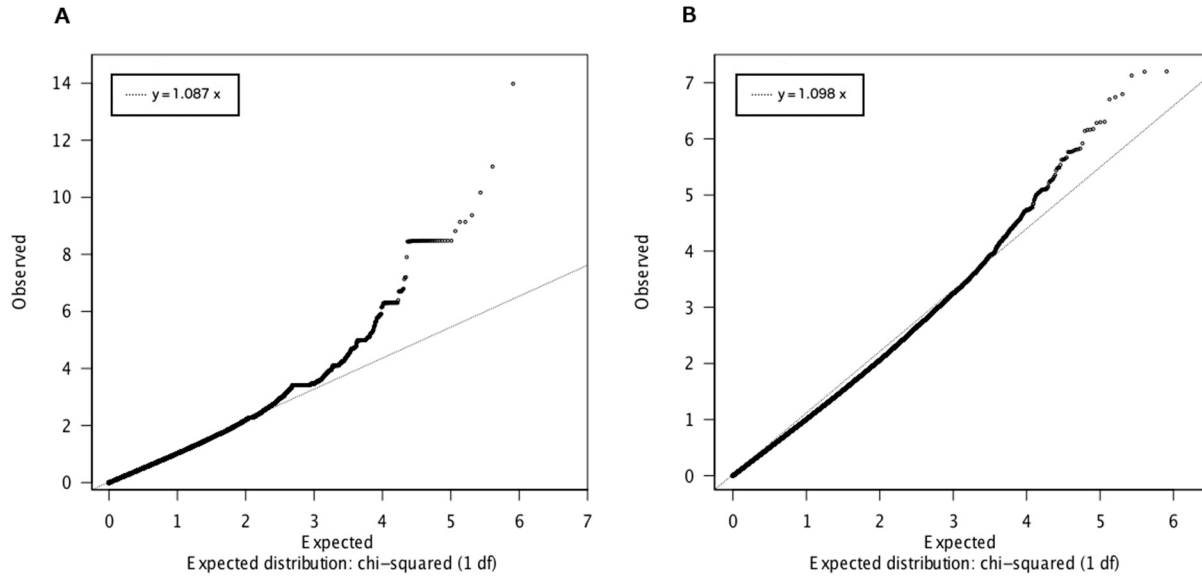

**Figure S2.** Quantile-quantile (Q-Q) plots showing observed vs. expected distribution of P-values for association of the GWAS-SNVs with Acute Pancreatitis (AP). For this analysis only genotyped SNVs that passed quality control were included.

(A) Q-Q-plot of all SNVs included in approach 1 of the GWAS study. The plot was calculated under exclusion of all SNVs within the extended MHC region (Chr. 6, 29-33 Mb:  $n=10,815$  SNVs in interval), leaving 817,184 SNVs for plotting. The genomic inflation factor, based on the median chi-squared ( $\lambda=1.09$ ) indicated no or minimal undetected population stratification or cryptic relatedness.

(B) Q-Q-plot of all SNVs included in approach 2 of the GWAS study. The plot was calculated under exclusion of all SNVs within the extended MHC region (Chr. 6, 29-33 Mb:  $n=9,604$  SNVs in interval), leaving 809,126 SNVs for plotting. The genomic inflation factor, based on the median chi-squared ( $\lambda=1.10$ ) indicated no or minimal undetected population stratification or cryptic relatedness.





**Figure S4.** Regional plots of the loci of the SNVs identified within the second approach of the GWAS of AP patients and controls (with exception of the SNVs located at the genes *FGF10* and *ASPG*, which are represented in Figure 1 in the article). The chromosome position (x-axis) of SNVs near the candidate SNV is plotted against their association with AP (y-axis). The degree of linkage disequilibrium ( $r^2$ ) for each SNV located in the vicinity of the candidate SNV is color-coded. Recombination activity (in centimorgans (cM) per Mb) is depicted by a blue line. Positions are given as NCBI's build coordinates.
